# Supplementary material
Source: publisher site journal article supplement (https://www.dovepress.com/get_supplementary_file.php?f=418295.docx)
Supplement: Supplementary file 1 [file get_supplementary_file.php]

**Appendix 1**. Search Strategy

Ovid MEDLINE(R) ALL <1946 to June 07, 2022>

| **#** | **Searches** | **Results** | **Type** |
| --- | --- | --- | --- |
|  | | | | | | |
| 1 | [COPD] | 0 | Advanced |  |  |  |
| 2 | exp Pulmonary Disease, Chronic Obstructive/ | 63601 | Advanced |  |  |  |
| 3 | Lung Diseases, Obstructive/ [previous term] | 18260 | Advanced |  |  |  |
| 4 | Coad.mp. | 772 | Advanced |  |  |  |
| 5 | Copd.mp. | 54506 | Advanced |  |  |  |
| 6 | (centriacinar adj2 emphysema*).mp. | 34 | Advanced |  |  |  |
| 7 | (centrilobular adj2 emphysema*).mp. | 228 | Advanced |  |  |  |
| 8 | (chronic adj3 obstructive bronchopulmonary disease*).mp. | 55 | Advanced |  |  |  |
| 9 | (chronic adj3 airflow obstruction*).mp. | 710 | Advanced |  |  |  |
| 10 | (chronic adj3 bronchitis).mp. | 11676 | Advanced |  |  |  |
| 11 | (chronic adj3 obstructive airway disease*).mp. | 424 | Advanced |  |  |  |
| 12 | (chronic adj3 airway obstruction*).mp. | 605 | Advanced |  |  |  |
| 13 | (chronic adj3 obstructive lung disease*).mp. | 4963 | Advanced |  |  |  |
| 14 | (chronic adj3 obstructive lung disorder*).mp. | 12 | Advanced |  |  |  |
| 15 | (chronic adj3 obstructive pulmonary disease*).mp. | 57683 | Advanced |  |  |  |
| 16 | (chronic adj3 obstructive pulmonary disorder*).mp. | 295 | Advanced |  |  |  |
| 17 | (chronic adj3 obstructive respiratory disease*).mp. | 142 | Advanced |  |  |  |
| 18 | (chronic adj3 obstructive respiratory tract disease*).mp. | 47 | Advanced |  |  |  |
| 19 | (focal adj2 emphysema*).mp. | 53 | Advanced |  |  |  |
| 20 | (lung adj3 chronic obstructive disease*).mp. | 13 | Advanced |  |  |  |
| 21 | (panacinar adj2 emphysema*).mp. | 100 | Advanced |  |  |  |
| 22 | (panlobular adj2 emphysema*).mp. | 129 | Advanced |  |  |  |
| 23 | (pulmonary adj2 emphysema*).mp. | 18072 | Advanced |  |  |  |
| 24 | or/1-23 | 117970 | Advanced |  |  |  |
| 25 | Patient Readmission/ | 21581 | Advanced |  |  |  |
| 26 | readmission?.mp. | 43085 | Advanced |  |  |  |
| 27 | re-admission?.mp. | 2570 | Advanced |  |  |  |
| 28 | rehospitali?ation?.mp. | 6834 | Advanced |  |  |  |
| 29 | re-hospitali?ation?.mp. | 1793 | Advanced |  |  |  |
| 30 | readmit*.mp. | 8537 | Advanced |  |  |  |
| 31 | (multiple adj2 admission*).mp. | 951 | Advanced |  |  |  |
| 32 | (repeat* adj3 admission*).mp. | 960 | Advanced |  |  |  |
| 33 | (repeat* adj3 hospital*).mp. | 2268 | Advanced |  |  |  |
| 34 | or/25-33 | 57030 | Advanced |  |  |  |
| 35 | 24 and 34 | 2003 | Advanced |  |  |  |
| 36 | predict:.mp. | 1964255 | Advanced |  |  |  |
| 37 | scor:.tw. | 1181667 | Advanced |  |  |  |
| 38 | observ:.mp. | 4018661 | Advanced |  |  |  |
| 39 | validat:.mp. | 701854 | Advanced |  |  |  |
| 40 | develop.tw. | 677599 | Advanced |  |  |  |
| 41 | risk factors/ | 924829 | Advanced |  |  |  |
| 42 | (risk adj3 factor*).mp. | 1305515 | Advanced |  |  |  |
| 43 | (prognostic adj2 model*).mp. | 9066 | Advanced |  |  |  |
| 44 | or/36-43 | 8014929 | Advanced |  |  |  |
| 45 | 35 and 44 | 1237 | Advanced |  |  |  |
| 46 | animals/ not (animals/ and humans/) | 4981725 | Advanced |  |  |  |
| 47 | 45 not 46 | 1236 | Advanced |  |  |  |
| 48 | limit 47 to ("all infant (birth to 23 months)" or "all child (0 to 18 years)") | 63 | Advanced |  |  |  |
| 49 | limit 47 to "all adult (19 plus years)" | 848 | Advanced |  |  |  |
| 50 | 47 not 48 | 1173 | Advanced |  |  |  |
| 51 | 49 or 50 | 1230 | Advanced |  |  |  |
| 52 | remove duplicates from 51 | 1225 | Advanced |  |  |  |

Embase <1974 to 2022 June 07>

| **#** | **Searches** | **Results** | **Type** |
| --- | --- | --- | --- |
|  | | | | | | |
| 1 | chronic obstructive lung disease/ | 156103 | Advanced |  |  |  |
| 2 | Coad.mp. | 920 | Advanced |  |  |  |
| 3 | Copd.mp. | 102346 | Advanced |  |  |  |
| 4 | (centriacinar adj2 emphysema*).mp. | 46 | Advanced |  |  |  |
| 5 | (centrilobular adj2 emphysema*).mp. | 385 | Advanced |  |  |  |
| 6 | (chronic adj3 obstructive bronchopulmonary disease*).mp. | 67 | Advanced |  |  |  |
| 7 | (chronic adj3 airflow obstruction*).mp. | 894 | Advanced |  |  |  |
| 8 | (chronic adj3 bronchitis).mp. | 19175 | Advanced |  |  |  |
| 9 | (chronic adj3 obstructive airway disease*).mp. | 668 | Advanced |  |  |  |
| 10 | (chronic adj3 airway obstruction*).mp. | 828 | Advanced |  |  |  |
| 11 | (chronic adj3 obstructive lung disease*).mp. | 157120 | Advanced |  |  |  |
| 12 | (chronic adj3 obstructive lung disorder*).mp. | 19 | Advanced |  |  |  |
| 13 | (chronic adj3 obstructive pulmonary disease*).mp. | 84107 | Advanced |  |  |  |
| 14 | (chronic adj3 obstructive pulmonary disorder*).mp. | 486 | Advanced |  |  |  |
| 15 | (chronic adj3 obstructive respiratory disease*).mp. | 242 | Advanced |  |  |  |
| 16 | (chronic adj3 obstructive respiratory tract disease*).mp. | 31 | Advanced |  |  |  |
| 17 | (focal adj2 emphysema*).mp. | 84 | Advanced |  |  |  |
| 18 | (lung adj3 chronic obstructive disease*).mp. | 10 | Advanced |  |  |  |
| 19 | (panacinar adj2 emphysema*).mp. | 138 | Advanced |  |  |  |
| 20 | (panlobular adj2 emphysema*).mp. | 207 | Advanced |  |  |  |
| 21 | (pulmonary adj2 emphysema*).mp. | 5437 | Advanced |  |  |  |
| 22 | or/1-21 | 202580 | Advanced |  |  |  |
| 23 | hospital readmission/ | 83739 | Advanced |  |  |  |
| 24 | readmission?.mp. | 95354 | Advanced |  |  |  |
| 25 | re-admission?.mp. | 6416 | Advanced |  |  |  |
| 26 | rehospitali?ation?.mp. | 11337 | Advanced |  |  |  |
| 27 | re-hospitali?ation?.mp. | 4706 | Advanced |  |  |  |
| 28 | readmit*.mp. | 17718 | Advanced |  |  |  |
| 29 | (multiple adj2 admission*).mp. | 2196 | Advanced |  |  |  |
| 30 | (repeat* adj3 admission*).mp. | 1859 | Advanced |  |  |  |
| 31 | (repeat* adj3 hospital*).mp. | 3992 | Advanced |  |  |  |
| 32 | or/23-31 | 115680 | Advanced |  |  |  |
| 33 | 22 and 32 | 5505 | Advanced |  |  |  |
| 34 | predict:.tw. | 2497877 | Advanced |  |  |  |
| 35 | exp methodology/ | 6881234 | Advanced |  |  |  |
| 36 | validat:.tw. | 935060 | Advanced |  |  |  |
| 37 | index.tw. | 1311059 | Advanced |  |  |  |
| 38 | model.tw. | 3080231 | Advanced |  |  |  |
| 39 | risk factor/ | 1213931 | Advanced |  |  |  |
| 40 | (risk adj3 factor*).mp. | 1618374 | Advanced |  |  |  |
| 41 | (prognostic adj2 model*).mp. | 13037 | Advanced |  |  |  |
| 42 | or/34-41 | 12467508 | Advanced |  |  |  |
| 43 | 33 and 42 | 4189 | Advanced |  |  |  |
| 44 | (exp animals/ or exp animal experimentation/ or nonhuman/) not ((exp animals/ or exp animal experimentation/ or nonhuman/) and exp human/) | 6931306 | Advanced |  |  |  |
| 45 | 43 not 44 | 4174 | Advanced |  |  |  |
| 46 | limit 45 to (embryo <first trimester> or infant <to one year> or child <unspecified age> or preschool child <1 to 6 years> or school child <7 to 12 years> or adolescent <13 to 17 years>) | 70 | Advanced |  |  |  |
| 47 | limit 45 to (adult <18 to 64 years> or aged <65+ years>) | 2918 | Advanced |  |  |  |
| 48 | 45 not 46 | 4104 | Advanced |  |  |  |
| 49 | 47 or 48 | 4164 | Advanced |  |  |  |
| 50 | limit 49 to (books or conference abstract or conference paper or "conference review" or book or book series or conference proceeding) | 1633 | Advanced |  |  |  |
| 51 | 49 not 50 | 2531 | Advanced |  |  |  |
| 52 | remove duplicates from 51 | 2506 | Advanced |  |  |  |

EBM Reviews - Cochrane Central Register of Controlled Trials

| **#** | **Searches** | **Results** | **Type** |
| --- | --- | --- | --- |
|  | | | | | | |
| 1 | [COPD] | 0 | Advanced |  |  |  | |
| 2 | exp Pulmonary Disease, Chronic Obstructive/ | 6243 | Advanced |  |  |  | |
| 3 | Lung Diseases, Obstructive/ [previous term] | 3124 | Advanced |  |  |  | |
| 4 | Coad.mp. | 66 | Advanced |  |  |  | |
| 5 | Copd.mp. | 17876 | Advanced |  |  |  | |
| 6 | (centriacinar adj2 emphysema*).mp. | 1 | Advanced |  |  |  | |
| 7 | (centrilobular adj2 emphysema*).mp. | 4 | Advanced |  |  |  | |
| 8 | (chronic adj3 obstructive bronchopulmonary disease*).mp. | 1 | Advanced |  |  |  | |
| 9 | (chronic adj3 airflow obstruction*).mp. | 139 | Advanced |  |  |  | |
| 10 | (chronic adj3 bronchitis).mp. | 2025 | Advanced |  |  |  | |
| 11 | (chronic adj3 obstructive airway disease*).mp. | 81 | Advanced |  |  |  | |
| 12 | (chronic adj3 airway obstruction*).mp. | 113 | Advanced |  |  |  | |
| 13 | (chronic adj3 obstructive lung disease*).mp. | 7684 | Advanced |  |  |  | |
| 14 | (chronic adj3 obstructive lung disorder*).mp. | 1 | Advanced |  |  |  | |
| 15 | (chronic adj3 obstructive pulmonary disease*).mp. | 12730 | Advanced |  |  |  | |
| 16 | (chronic adj3 obstructive pulmonary disorder*).mp. | 48 | Advanced |  |  |  | |
| 17 | (chronic adj3 obstructive respiratory disease*).mp. | 15 | Advanced |  |  |  | |
| 18 | (chronic adj3 obstructive respiratory tract disease*).mp. | 9 | Advanced |  |  |  | |
| 19 | (focal adj2 emphysema*).mp. | 0 | Advanced |  |  |  | |
| 20 | (lung adj3 chronic obstructive disease*).mp. | 1 | Advanced |  |  |  | |
| 21 | (panacinar adj2 emphysema*).mp. | 0 | Advanced |  |  |  | |
| 22 | (panlobular adj2 emphysema*).mp. | 1 | Advanced |  |  |  | |
| 23 | (pulmonary adj2 emphysema*).mp. | 496 | Advanced |  |  |  | |
| 24 | or/1-23 | 25051 | Advanced |  |  |  | |
| 25 | Patient Readmission/ | 1160 | Advanced |  |  |  | |
| 26 | readmission?.mp. | 8219 | Advanced |  |  |  | |
| 27 | re-admission?.mp. | 879 | Advanced |  |  |  | |
| 28 | rehospitali?ation?.mp. | 1923 | Advanced |  |  |  | |
| 29 | re-hospitali?ation?.mp. | 862 | Advanced |  |  |  | |
| 30 | readmit*.mp. | 752 | Advanced |  |  |  | |
| 31 | (multiple adj2 admission*).mp. | 59 | Advanced |  |  |  | |
| 32 | (repeat* adj3 admission*).mp. | 133 | Advanced |  |  |  | |
| 33 | (repeat* adj3 hospital*).mp. | 379 | Advanced |  |  |  | |
| 34 | or/25-33 | 10925 | Advanced |  |  |  | |
| 35 | 24 and 34 | 610 | Advanced |  |  |  | |
| 36 | predict:.mp. | 118038 | Advanced |  |  |  | |
| 37 | scor:.tw. | 299274 | Advanced |  |  |  | |
| 38 | observ:.mp. | 304895 | Advanced |  |  |  | |
| 39 | validat:.mp. | 49006 | Advanced |  |  |  | |
| 40 | develop.tw. | 32085 | Advanced |  |  |  | |
| 41 | risk factors/ | 26784 | Advanced |  |  |  | |
| 42 | (risk adj3 factor*).mp. | 81791 | Advanced |  |  |  | |
| 43 | (prognostic adj2 model*).mp. | 680 | Advanced |  |  |  | |
| 44 | or/36-43 | 698121 | Advanced |  |  |  | |
| 45 | 35 and 44 | 302 | Advanced |  |  |  | |
| 46 | remove duplicates from 45 | 297 | Advanced |  |  |  | |

EBM Reviews - Cochrane Database of Systematic Reviews <2005 to June 1, 2022>

| **#** | **Searches** | **Results** | **Type** |
| --- | --- | --- | --- |
|  | | | | | | |
| 1 | Coad.ti,ab. | 0 | Advanced |  |  |  | |
| 2 | Copd.ti,ab. | 138 | Advanced |  |  |  | |
| 3 | (centriacinar adj2 emphysema*).ti,ab. | 0 | Advanced |  |  |  | |
| 4 | (centrilobular adj2 emphysema*).ti,ab. | 0 | Advanced |  |  |  | |
| 5 | (chronic adj3 obstructive bronchopulmonary disease*).ti,ab. | 0 | Advanced |  |  |  | |
| 6 | (chronic adj3 airflow obstruction*).ti,ab. | 0 | Advanced |  |  |  | |
| 7 | (chronic adj3 bronchitis).ti,ab. | 9 | Advanced |  |  |  | |
| 8 | (chronic adj3 obstructive airway disease*).ti,ab. | 0 | Advanced |  |  |  | |
| 9 | (chronic adj3 airway obstruction*).ti,ab. | 1 | Advanced |  |  |  | |
| 10 | (chronic adj3 obstructive lung disease*).ti,ab. | 4 | Advanced |  |  |  | |
| 11 | (chronic adj3 obstructive lung disorder*).ti,ab. | 0 | Advanced |  |  |  | |
| 12 | (chronic adj3 obstructive pulmonary disease*).ti,ab. | 152 | Advanced |  |  |  | |
| 13 | (chronic adj3 obstructive pulmonary disorder*).ti,ab. | 0 | Advanced |  |  |  | |
| 14 | (chronic adj3 obstructive respiratory disease*).ti,ab. | 0 | Advanced |  |  |  | |
| 15 | (chronic adj3 obstructive respiratory tract disease*).ti,ab. | 0 | Advanced |  |  |  | |
| 16 | (focal adj2 emphysema*).ti,ab. | 0 | Advanced |  |  |  | |
| 17 | (lung adj3 chronic obstructive disease*).ti,ab. | 0 | Advanced |  |  |  | |
| 18 | (panacinar adj2 emphysema*).ti,ab. | 0 | Advanced |  |  |  | |
| 19 | (panlobular adj2 emphysema*).ti,ab. | 0 | Advanced |  |  |  | |
| 20 | (pulmonary adj2 emphysema*).ti,ab. | 11 | Advanced |  |  |  | |
| 21 | or/1-20 | 178 | Advanced |  |  |  | |
| 22 | readmission?.ti,ab. | 58 | Advanced |  |  |  | |
| 23 | re-admission?.ti,ab. | 11 | Advanced |  |  |  | |
| 24 | rehospitali?ation?.ti,ab. | 20 | Advanced |  |  |  | |
| 25 | re-hospitali?ation?.ti,ab. | 15 | Advanced |  |  |  | |
| 26 | readmit*.ti,ab. | 7 | Advanced |  |  |  | |
| 27 | (multiple adj2 admission*).ti,ab. | 0 | Advanced |  |  |  | |
| 28 | (repeat* adj3 admission*).ti,ab. | 1 | Advanced |  |  |  | |
| 29 | (repeat* adj3 hospital*).ti,ab. | 3 | Advanced |  |  |  | |
| 30 | or/22-29 | 108 | Advanced |  |  |  | |
| 31 | 21 and 30 | 7 | Advanced |  |  |  | |
| 32 | predict:.ti,ab. | 278 | Advanced |  |  |  | |
| 33 | scor:.tw. | 7119 | Advanced |  |  |  | |
| 34 | observ:.ti,ab. | 1150 | Advanced |  |  |  | |
| 35 | validat:.ti,ab. | 360 | Advanced |  |  |  | |
| 36 | develop.tw. | 3736 | Advanced |  |  |  | |
| 37 | (risk adj3 factor*).ti,ab. | 264 | Advanced |  |  |  | |
| 38 | (prognostic adj2 model*).ti,ab. | 10 | Advanced |  |  |  | |
| 39 | or/32-38 | 8541 | Advanced |  |  |  | |
| 40 | 31 and 39 | 7 | Advanced |  |  |  | |

**Supplementary Table 1.** Significant Predictors for All-Cause Readmission

| **Variable Type** | **Type I Error** | **1 Month** | **2-3 Months** | **6-12 Months** |
| --- | --- | --- | --- | --- |
| Patient Characteristics | | | | | |
| Age | < 0.05 | Correlated29,53,105,172  Inversely Correlated191 | Correlated38  Inversely Correlated183 | Correlated53,66,127 |
| < 0.01 | Correlated33,49,50,123,185,233,253  Inversely Correlated34,122,151,214,221 | Correlated111,123 | Correlated123  Inversely Correlated76 |
| Not Reported |  |  |  |
| Alcohol/Drug Abuse | < 0.05 | Correlated29 |  |  |
| < 0.01 | Correlated49,224 | Correlated34,205 |  |
| Not Reported |  |  |  |
| Community-Acquired Pneumonia | < 0.05 | Correlated83,210  Inversely Correlated208 | Correlated254 |  |
| < 0.01 | Correlated50 | Correlated50 |  |
| Not Reported |  |  |  |
| COPD Severity, Assessed by Scales | < 0.05 |  |  |  |
| < 0.01 | Correlated25,49,50,105,247,250 | Correlated50 | Correlated53,55,127,244 |
| Not Reported |  |  |  |
| Dyspnea | < 0.05 | Correlated54 | Correlated38 | Correlated84 |
| < 0.01 | Correlated105 |  |  |
| Not Reported |  |  |  |
| Free-Fat Mass | < 0.05 |  | Inversely Correlated98 |  |
| < 0.01 |  |  |  |
| Not Reported |  |  |  |
| Income | < 0.05 | Correlated215 |  |  |
| < 0.01 | Inversely Correlated122,224 |  | Correlated97 |
| Not Reported |  |  |  |
| Insurance: Insured vs Uninsured | < 0.05 |  |  |  |
| < 0.01 | Correlated185 |  |  |
| Not Reported |  |  |  |
| Insurance: Dually Enrolled in Medicare and Medicaid | < 0.05 |  |  |  |
| < 0.01 | Correlated214 |  |  |
| Not Reported |  |  |  |
| Insurance: Public Insurance/Medicare/Medicaid vs Private Insurance | < 0.05 |  |  |  |
| < 0.01 | Correlated49,53,122,128,151 |  |  |
| Not Reported |  |  |  |
| Male | < 0.05 | Correlated16,35,151,172,178,215,216  Inversely Correlated123 | Inversely Correlated123 | Correlated59  Inversely Correlated123 |
| < 0.01 | Correlated49,53,74,122,128,140,185,214,224,232 Inversely Correlated253 | Correlated195 | Correlated41,76 |
| Not Reported | Correlated201 |  |  |
| Malnutrition | < 0.05 | Correlated74 |  | Correlated139 |
| < 0.01 | Correlated33,74,253 |  |  |
| Not Reported |  |  |  |
| Marital Status: Single vs Other | < 0.05 |  |  | Correlated244 |
| < 0.01 |  |  |  |
| Not Reported |  |  |  |
| Marital Status: Living with Partner | < 0.05 |  |  |  |
| < 0.01 | Inversely Correlated34 |  |  |
| Not Reported |  |  |  |
| Medical/Pharmacy Costs Prior to Admission | < 0.05 |  |  | Correlated234 |
| < 0.01 |  |  |  |
| Not Reported |  |  |  |
| Muscle Mass | < 0.05 |  | Inversely Correlated98 |  |
| < 0.01 |  |  |  |
| Not Reported |  |  |  |
| Pacemaker | < 0.05 | Inversely Correlated208 |  |  |
| < 0.01 |  |  |  |
| Not Reported |  |  |  |
| Poorer Performance Status/Activities of Daily Living | < 0.05 | Correlated204,232 | Correlated38,84 | Correlated58,80,81 |
| < 0.01 | Correlated25,84,247 | Correlated25,195,198 | Correlated30,84,104 |
| Not Reported |  | Correlated62 |  |
| Poor Control of COPD | < 0.05 |  |  |  |
| < 0.01 | Correlated191 |  |  |
| Not Reported |  |  |  |
| Prior Hospitalization | < 0.05 | Correlated54,84,178,212,233 | Correlated20,38,178,183 | Correlated178 |
| < 0.01 | Correlated25,31,49,105,125,172,175,176,208,215,216 | Correlated22,25,31,45,84,89,91,111,125,195,198,209,212,215 | Correlated41,55,81,87,104 |
| Not Reported |  | Correlated62 |  |
| Quality of Life | < 0.05 |  | Inversely Correlated198 |  |
| < 0.01 |  |  |  |
| Not Reported |  |  |  |
| Race: Asian | < 0.05 |  |  |  |
| < 0.01 | Correlated232 |  |  |
| Not Reported |  |  |  |
| Race: Black | < 0.05 | Inversely Correlated172 |  |  |
| < 0.01 | Correlated102,151,214 |  |  |
| Not Reported |  |  |  |
| Race: Hispanic | < 0.05 | Inversely Correlated172 |  |  |
| < 0.01 |  |  |  |
| Not Reported |  |  |  |
| Race: Indigenous | < 0.05 | Correlated178 |  | Correlated178 |
| < 0.01 |  |  |  |
| Not Reported |  |  |  |
| Tobacco Smoker | < 0.05 | Correlated247 | Correlated45 |  |
| < 0.01 | Inversely Correlated253 | Inversely Correlated38 |  |
| Not Reported |  |  |  |
| Vaccination: Influenza | < 0.05 | Correlated170 |  |  |
| < 0.01 | Inversely Correlated232 |  |  |
| Not Reported |  |  |  |
| Comorbidities | | | | | |
| # of Comorbidities | < 0.05 | Correlated29,34,35,123,172 | Correlated38,123 | Correlated123 |
| < 0.01 | Correlated122 | Correlated34,205 | Correlated244 |
| Not Reported |  |  |  |
| Anxiety | < 0.05 | Correlated14,29,176,232 |  |  |
| < 0.01 | Correlated83,216,232 |  |  |
| Not Reported |  |  |  |
| Arrhythmias | < 0.05 | Correlated24 |  | Correlated56 |
| < 0.01 |  |  |  |
| Not Reported |  |  |  |
| Asthma | < 0.05 |  |  |  |
| < 0.01 | Inversely Correlated50 | Inversely Correlated50 |  |
| Not Reported |  |  |  |
| Atrial Fibrillation | < 0.05 |  |  |  |
| < 0.01 | Correlated33 |  |  |
| Not Reported |  |  |  |
| Cancer | < 0.05 |  | Correlated31 |  |
| < 0.01 | Correlated31,33,49,50,253 | Correlated50 |  |
| Not Reported |  |  |  |
| Cardiovascular Comorbidities | < 0.05 | Correlated34,103 | Correlated38,198 |  |
| < 0.01 | Correlated49 | Correlated34 |  |
| Not Reported |  |  |  |
| Cerebrovascular Disease | < 0.05 |  |  |  |
| < 0.01 | Correlated49 |  | Correlated31 |
| Not Reported |  |  |  |
| Charlson Comorbidity Index | < 0.05 | Correlated74,215,255 | Correlated195,215 | Inversely Correlated178 |
| < 0.01 | Correlated33,50,128,175,176,214,253 | Correlated50,111 |  |
| Not Reported |  |  |  |
| Chronic Kidney Disease | < 0.05 | Correlated54 | Correlated31 | Inversely Correlated76 |
| < 0.01 | Correlated33,49,50,122,250 | Correlated50 | Correlated31 |
| Not Reported |  |  |  |
| Chronic Pain | < 0.05 |  |  |  |
| < 0.01 | Correlated176 |  |  |
| Not Reported |  |  |  |
| Connective Tissue/Rheumatologic Disease | < 0.05 |  |  | Correlated31 |
| < 0.01 |  | Correlated208 |  |
| Not Reported |  |  |  |
| Coronary Heart Disease | < 0.05 |  |  |  |
| < 0.01 | Inversely Correlated255 |  |  |
| Not Reported |  |  |  |
| Dementia | < 0.05 | Correlated49 |  |  |
| < 0.01 |  |  |  |
| Not Reported |  |  |  |
| Depression | < 0.05 | Correlated25,216,232 |  | Correlated66,97,108 |
| < 0.01 | Correlated14,49,151,224,250 |  |  |
| Not Reported |  |  |  |
| Diabetes | < 0.05 | Correlated212,232 | Correlated31,205  Inversely Correlated111 | Correlated108 |
| < 0.01 | Correlated31,33,49,122,151,176,232 |  | Correlated30 |
| Not Reported |  |  |  |
| Disability | < 0.05 | Correlated172 |  |  |
| < 0.01 |  |  |  |
| Not Reported |  |  |  |
| Gastro-Esophageal Reflux | < 0.05 |  | Inversely Correlated208 |  |
| < 0.01 |  |  |  |
| Not Reported |  |  |  |
| Heart Failure | < 0.05 | Correlated24,29,216,232 |  | Correlated56,108 |
| < 0.01 | Correlated31,33,49,122,176,250,253 | Correlated31 | Correlated31 |
| Not Reported |  |  |  |
| Right-Sided Heart Failure/Cor Pulmonale | < 0.05 |  | Inversely Correlated208 |  |
| < 0.01 |  | Correlated205 |  |
| Not Reported |  |  |  |
| Hematologic Malignancy | < 0.05 |  |  |  |
| < 0.01 | Inversely Correlated208 | Correlated208 |  |
| Not Reported |  |  |  |
| Hemiplegia/Paraplegia | < 0.05 |  |  |  |
| < 0.01 | Correlated49 |  |  |
| Not Reported |  |  |  |
| HIV/AIDS | < 0.05 |  |  |  |
| < 0.01 | Correlated49 |  |  |
| Not Reported |  |  |  |
| Hypertension | < 0.05 | Correlated212,232 |  |  |
| < 0.01 | Inversely Correlated49 |  |  |
| Not Reported |  |  |  |
| Ischemic Heart Disease | < 0.05 | Correlated232 | Correlated20 |  |
| < 0.01 |  | Correlated50,205 |  |
| Not Reported |  |  |  |
| Liver Disease | < 0.05 |  |  | Correlated31 |
| < 0.01 | Correlated31,49 | Correlated31 |  |
| Not Reported |  |  |  |
| Lung Cancer | < 0.05 |  |  |  |
| < 0.01 | Correlated50,216 | Correlated50,205 |  |
| Not Reported |  |  |  |
| Mental Comorbidity | < 0.05 |  |  |  |
| < 0.01 | Correlated34 | Correlated34 |  |
| Not Reported |  |  |  |
| Myocardial Infarction | < 0.05 |  | Correlated31 |  |
| < 0.01 | Correlated49 |  | Correlated31 |
| Not Reported |  |  |  |
| Neurological Condition | < 0.05 |  |  |  |
| < 0.01 |  | Correlated205 |  |
| Not Reported |  |  |  |
| Neuromuscular Disease | < 0.05 | Correlated247 |  |  |
| < 0.01 |  |  |  |
| Not Reported |  |  |  |
| Obesity | < 0.05 |  |  | Correlated84 |
| < 0.01 | Inversely Correlated74,122,253 |  |  |
| Not Reported |  |  |  |
| Osteoarthritis | < 0.05 | Correlated232 |  |  |
| < 0.01 |  |  |  |
| Not Reported |  |  |  |
| Osteoporosis | < 0.05 |  |  |  |
| < 0.01 | Correlated216 |  |  |
| Not Reported |  |  |  |
| Paralysis | < 0.05 |  |  |  |
| < 0.01 | Correlated49 |  |  |
| Not Reported |  |  |  |
| Peptic Ulcer Disease | < 0.05 | Correlated212 |  |  |
| < 0.01 | Correlated49 |  |  |
| Not Reported |  |  |  |
| Peripheral Vascular Disease | < 0.05 |  |  |  |
| < 0.01 | Correlated49 |  | Correlated31 |
| Not Reported |  |  |  |
| Psychosis | < 0.05 |  |  |  |
| < 0.01 | Correlated49,151,224 |  |  |
| Not Reported |  |  |  |
| Pulmonary Hypertension | < 0.05 |  |  |  |
| < 0.01 | Correlated176 |  |  |
| Not Reported |  |  |  |
| Pulmonary Vascular Disease | < 0.05 |  |  |  |
| < 0.01 | Correlated250 |  | Correlated56 |
| Not Reported |  |  |  |
| Thrombo-Embolic Disease | < 0.05 |  | Inversely Correlated208 |  |
| < 0.01 |  |  |  |
| Not Reported |  |  |  |
| Medications Prior to Admission | | | | | |
| # of Medications | < 0.05 |  | Correlated204 |  |
| < 0.01 |  |  |  |
| Not Reported |  |  |  |
| Angiotensin Converting Enzyme Inhibitor | < 0.05 | Inversely Correlated216 |  |  |
| < 0.01 |  |  |  |
| Not Reported |  |  |  |
| Anti-Muscarinics Before Hospitalization | < 0.05 | Correlated29 |  |  |
| < 0.01 |  |  |  |
| Not Reported |  |  |  |
| Long-Term Oxygen Therapy | < 0.05 | Correlated24 | Correlated183 | Correlated100 |
| < 0.01 |  |  | Correlated104 |
| Not Reported |  |  |  |
| Long-Acting Muscarinic Agonist | < 0.05 |  |  |  |
| < 0.01 |  | Correlated215 |  |
| Not Reported |  |  |  |
| Long-Acting Muscarinic Agonist + Long-Acting Beta-Agonist + Inhaled Corticosteroids | < 0.05 |  |  |  |
| < 0.01 | Correlated247 |  |  |
| Not Reported |  |  |  |
| Short-Acting Beta Agonist | < 0.05 |  |  |  |
| < 0.01 |  | Correlated215 |  |
| Not Reported |  |  |  |
| Statin | < 0.05 |  |  |  |
| < 0.01 | Inversely Correlated216 |  |  |
| Not Reported |  |  |  |
| Steroid | < 0.05 |  | Correlated215 | Correlated244 |
| < 0.01 |  |  |  |
| Not Reported |  |  |  |
| Hospital Care | | | | | |
| Admission to ICU | < 0.05 | Correlated172,224,250 | Correlated183 |  |
| < 0.01 | Correlated214 |  |  |
| Not Reported |  |  |  |
| Hospital Length of Stay | < 0.05 | Correlated25,33,172,216,224,250 | Correlated38  Inversely Correlated183 | Correlated76,104 |
| < 0.01 | Correlated49,50,105,122,128,140,185,202,214,253 | Correlated50 |  |
| Not Reported |  |  |  |
| Intubation | < 0.05 |  | Inversely Correlated208 |  |
| < 0.01 | Correlated49 | Correlated111 |  |
| Not Reported |  |  |  |
| Non-Invasive Ventilation | < 0.05 | Correlated74,212 |  |  |
| < 0.01 | Correlated33,49,247 | Correlated38 |  |
| Not Reported |  |  |  |
| Steroid Treatment Success | < 0.05 | Inversely Correlated69 |  | Inversely Correlated69 |
| < 0.01 |  | Inversely Correlated69 |  |
| Not Reported |  |  |  |
| Investigations | | | | | |
| Adenovirus-Specific IgG Maturation | < 0.05 |  |  |  |
| < 0.01 |  |  | Correlated41 |
| Not Reported |  |  |  |
| Anemia | < 0.05 |  |  | Correlated108  Inversely Correlated76 |
| < 0.01 | Correlated33,49,175,176,250 |  |  |
| Not Reported |  |  |  |
| C-Reactive Protein | < 0.05 | Correlated60 |  |  |
| < 0.01 |  |  | Correlated53,127  Inversely Correlated76 |
| Not Reported |  |  |  |
| Eosinophil Count | < 0.05 | Inversely Correlated135,199 | Correlated114 | Correlated65  Inversely Correlated76,156 |
| < 0.01 | Correlated247 |  | Correlated114 |
| Not Reported |  |  |  |
| FEV1 | < 0.05 | Inversely Correlated204,235,249 | Inversely Correlated89,182 | Inversely Correlated66 |
| < 0.01 | Inversely Correlated105,212,247 |  | Inversely Correlated53,87,104 |
| Not Reported |  |  |  |
| FEV1/FVC | < 0.05 |  |  |  |
| < 0.01 | Inversely Correlated247 |  |  |
| Not Reported |  |  |  |
| Flow Limitation in Supine Position | < 0.05 |  | Correlated25 |  |
| < 0.01 |  |  |  |
| Not Reported |  |  |  |
| FVC % Predicted | < 0.05 |  |  |  |
| < 0.01 |  |  | Inversely Correlated104 |
| Not Reported |  |  |  |
| Gamma Fraction | < 0.05 |  |  |  |
| < 0.01 |  |  | Inversely Correlated42 |
| Not Reported |  |  |  |
| Glutamic-Pyruvic Transaminase | < 0.05 |  |  | Inversely Correlated55 |
| < 0.01 |  |  |  |
| Not Reported |  |  |  |
| Leukocyte Count | < 0.05 |  |  |  |
| < 0.01 | Correlated60 |  | Correlated76 |
| Not Reported |  |  |  |
| Maximal Inspiratory Pressure < 70 H2O | < 0.05 |  |  | Correlated100 |
| < 0.01 |  |  |  |
| Not Reported |  |  |  |
| Mean Airway Pressure at the Mouth > 0.31 cm H20 | < 0.05 |  |  | Correlated100 |
| < 0.01 |  |  |  |
| Not Reported |  |  |  |
| Neutrophil-to-Lymphocyte Ratio | < 0.05 |  |  |  |
| < 0.01 | Correlated60 |  | Correlated76 |
| Not Reported |  |  |  |
| Oxygen Saturation | < 0.05 |  |  | Inversely Correlated80 |
| < 0.01 |  |  |  |
| Not Reported |  |  |  |
| PaCO2 | < 0.05 |  |  | Correlated100,139 |
| < 0.01 | Correlated105 |  |  |
| Not Reported |  |  |  |
| Peak Inspiratory Flow Rate at Admission | < 0.05 |  |  |  |
| < 0.01 | Inversely Correlated25 | Inversely Correlated25 |  |
| Not Reported |  |  |  |
| Peak Inspiratory Flow Rate at Discharge | < 0.05 |  |  |  |
| < 0.01 | Inversely Correlated25 | Inversely Correlated25 |  |
| Not Reported |  |  |  |
| Main Pulmonary Artery Diameter | < 0.05 |  |  |  |
| < 0.01 |  | Correlated254 |  |
| Not Reported |  |  |  |
| pH | < 0.05 | Inversely Correlated105,255 |  |  |
| < 0.01 |  |  |  |
| Not Reported |  |  |  |
| Platelet Count | < 0.05 |  |  |  |
| < 0.01 | Correlated247 |  |  |
| Not Reported |  |  |  |
| Platelet Volume | < 0.05 |  |  |  |
| < 0.01 |  |  | Inversely Correlated76 |
| Not Reported |  |  |  |
| Platelet to Mean Platelet Volume | < 0.05 | Correlated60 |  |  |
| < 0.01 |  |  |  |
| Not Reported |  |  |  |
| Pressure-Time Index > 0.25 | < 0.05 |  |  |  |
| < 0.01 |  |  | Correlated100 |
| Not Reported |  |  |  |
| Red Cell Distribution Width | < 0.05 |  |  |  |
| < 0.01 | Correlated255 |  |  |
| Not Reported |  |  |  |
| Respiratory Acidosis | < 0.05 | Correlated74 |  |  |
| < 0.01 |  |  |  |
| Not Reported |  |  |  |
| Serum Creatinine | < 0.05 |  |  | Inversely Correlated76 |
| < 0.01 |  |  |  |
| Not Reported |  |  |  |
| Soluble Urokinase Plasminogen Activator Receptor | < 0.05 |  |  |  |
| < 0.01 |  |  | Correlated109 |
| Not Reported |  |  |  |
| Systolic Pulmonary Artery Pressure > 40 mmHg | < 0.05 |  |  | Correlated100 |
| < 0.01 |  |  |  |
| Not Reported |  |  |  |
| Medications During Hospitalization | | | | | |
| Antibiotics | < 0.05 |  |  |  |
| < 0.01 | Inversely Correlated216 |  |  |
| Not Reported |  |  |  |
| Anticholinergics | < 0.05 |  |  | Correlated87 |
| < 0.01 |  |  | Inversely Correlated104 |
| Not Reported |  |  |  |
| Analgesics | < 0.05 |  |  | Correlated81 |
| < 0.01 |  |  |  |
| Not Reported |  |  |  |
| Arformoterol vs Nebulized Short-Acting Beta Agonist | < 0.05 | Inversely Correlated43 |  |  |
| < 0.01 |  |  |  |
| Not Reported |  |  |  |
| Dry Powder Inhaler vs Nebulized Therapy | < 0.05 |  | Correlated160 |  |
| < 0.01 | Correlated160 |  |  |
| Not Reported |  |  |  |
| Fluoroquinolone | < 0.05 |  |  |  |
| < 0.01 | Correlated82 |  |  |
| Not Reported |  |  |  |
| Immunosuppressants | < 0.05 |  |  |  |
| < 0.01 |  | Correlated208 |  |
| Not Reported |  |  |  |
| Inhaled Corticosteroids | < 0.05 |  |  |  |
| < 0.01 | Inversely Correlated208 | Inversely Correlated208 | Inversely Correlated55 |
| Not Reported |  |  |  |
| Oxygen Therapy | < 0.05 |  |  |  |
| < 0.01 | Correlated175 |  | Correlated31 |
| Not Reported |  |  |  |
| Leukotriene Modifier | < 0.05 |  |  | Correlated31 |
| < 0.01 |  |  |  |
| Not Reported |  |  |  |
| Long-Acting Anti-Cholinergics | < 0.05 |  |  |  |
| < 0.01 | Correlated176 |  |  |
| Not Reported |  |  |  |
| Long-Acting Anti-Cholinergics and Inhaled Corticosteroids | < 0.05 |  |  |  |
| < 0.01 | Correlated176 |  |  |
| Not Reported |  |  |  |
| Long-Acting Beta-Agonist | < 0.05 | Correlated176 |  |  |
| < 0.01 |  |  | Correlated55 |
| Not Reported |  |  |  |
| Long-Acting Beta-Agonist vs Short-Acting Beta Agonist | < 0.05 | Correlated44 |  |  |
| < 0.01 |  |  |  |
| Not Reported |  |  |  |
| Long-Acting Beta-Agonist and Inhaled Corticosteroid | < 0.05 | Correlated176 |  |  |
| < 0.01 |  |  |  |
| Not Reported |  |  |  |
| Long-Acting Bronchodilator | < 0.05 |  |  |  |
| < 0.01 |  |  | Correlated31 |
| Not Reported |  |  |  |
| Nebulized Long-Acting Beta2-Agonist vs Nebulized Short-Acting Beta2-Agonist | < 0.05 |  |  |  |
| < 0.01 | Inversely Correlated136 |  |  |
| Not Reported |  |  |  |
| Nebulised Treatment | < 0.05 |  |  |  |
| < 0.01 |  |  | Correlated104 |
| Not Reported |  |  |  |
| Oral Nutritional Supplementation | < 0.05 | Inversely Correlated225 |  |  |
| < 0.01 |  |  |  |
| Not Reported |  |  |  |
| Oral Theophylline | < 0.05 |  |  |  |
| < 0.01 |  |  | Correlated104 |
| Not Reported |  |  |  |
| Roflumilast | < 0.05 | Inversely Correlated85 |  |  |
| < 0.01 |  |  |  |
| Not Reported |  |  |  |
| Short-Acting Bronchodilator | < 0.05 |  |  |  |
| < 0.01 |  |  | Correlated31 |
| Not Reported |  |  |  |
| Short-Acting Anti-Cholinergics | < 0.05 |  |  |  |
| < 0.01 | Correlated176 |  |  |
| Not Reported |  |  |  |
| Soft Mist Inhaler vs Dry Powder Inhaler | < 0.05 | Inversely Correlated223 |  |  |
| < 0.01 |  |  |  |
| Not Reported |  |  |  |
| Systemic Corticosteroids | < 0.05 | Correlated175 |  |  |
| < 0.01 | Correlated176 | Correlated31 | Correlated31,76 |
| Not Reported |  |  |  |
| Medications on Discharge | | | | | |
| Oral Steroid | < 0.05 | Inversely Correlated216 | Correlated195 |  |
| < 0.01 |  |  |  |
| Not Reported |  |  |  |
| Short-Acting Beta-Agonist/Short-Acting Muscarinic Antagonist | < 0.05 | Inversely Correlated216 |  |  |
| < 0.01 |  |  |  |
| Not Reported |  |  |  |
| Home Oxygen Use | < 0.05 |  |  |  |
| < 0.01 |  |  | Correlated30,59 |
| Not Reported |  |  |  |
| Maintenance Medication | < 0.05 | Inversely Correlated232 |  |  |
| < 0.01 |  |  | Inversely Correlated234 |
| Not Reported |  |  |  |
| Methylxanthines | < 0.05 |  | Correlated195 |  |
| < 0.01 |  |  |  |
| Not Reported |  |  |  |
| Short-Acting Muscarinic Antagonist | < 0.05 |  |  |  |
| < 0.01 |  | Correlated208 |  |
| Not Reported |  |  |  |
| Disposition | | | | | |
| Discharged with Home Care | < 0.05 |  |  | Correlated81 |
| < 0.01 | Correlated214 |  |  |
| Not Reported |  |  |  |
| Discharged to Long-Term Care/Skilled Nursing Facility | < 0.05 | Correlated74,232  Inversely Correlated224 |  | Correlated108 |
| < 0.01 | Correlated35,49,122,128 |  |  |
| Not Reported |  |  |  |
| Follow-Up Within 30 Days of Discharge | < 0.05 |  | Correlated125  Inversely Correlated91 |  |
| < 0.01 | Inversely Correlated216 | Correlated182,198 |  |
| Not Reported |  |  |  |
| Prediction Scores | | | | | |
| BODEX Index23 |  |  | p = 0.008 |  |
| CODEX Index23 |  |  | p < 0.0001 | p < 0.0001 |
| CORE Score247 | p < 0.001 |  |  |  |
| DOSE Index23 |  |  | p < 0.01 |  |
| PEARL Score143 | p < 0.0001 |  |  |  |
| RACE Scale151 | R2 = 0.923 |  |  |  |

**Supplementary Table 2.** Significant Predictors for COPD-Related Readmission

|  | **Type I Error** | **1 Month** | **2-3 Months** | **6-12 Months** |
| --- | --- | --- | --- | --- |
| Patient Characteristics | | | | |
| Age | < 0.05 | Correlated219,245 |  | Correlated31,129,234 |
| < 0.01 | Correlated50,110  Inversely Correlated34,48,206 | Correlated50,110  Inversely Correlated34 |  |
| Not Reported |  |  |  |
| Community-Acquired Pneumonia | < 0.05 |  |  |  |
| < 0.01 | Correlated50 | Correlated50 |  |
| Not Reported |  |  |  |
| COPD Severity, Assessed by Scales | < 0.05 |  |  | Correlated21,187 |
| < 0.01 | Correlated50 | Correlated50 |  |
| Not Reported |  |  |  |
| Dyspnea | < 0.05 | Correlated116 |  | Correlated21 |
| < 0.01 | Correlated206 |  | Correlated206 |
| Not Reported |  |  |  |
| Income | < 0.05 | Inversely Correlated48 |  |  |
| < 0.01 |  |  |  |
| Not Reported |  |  |  |
| Insurance: Public Insurance vs Private Insurance | < 0.05 |  |  |  |
| < 0.01 | Correlated48 |  |  |
| Not Reported |  |  |  |
| Hypoxemia | < 0.05 | Correlated206 |  |  |
| < 0.01 |  |  | Correlated206 |
| Not Reported |  |  |  |
| Male | < 0.05 |  |  | Correlated129 |
| < 0.01 | Correlated48 |  |  |
| Not Reported | Correlated201 |  |  |
| Prior Hospitalization | < 0.05 |  |  | Correlated129 |
| < 0.01 | Correlated31,70 | Correlated22,31 | Correlated21,31 |
| Not Reported |  |  |  |
| Relapses | < 0.05 |  |  |  |
| < 0.01 | Correlated116 |  |  |
| Not Reported |  |  |  |
| Tobacco Smoking | < 0.05 |  |  |  |
| < 0.01 |  | Correlated34 | Correlated206 |
| Not Reported |  |  |  |
| Comorbidities | | | | |
| # of Comorbidities | < 0.05 |  |  |  |
| < 0.01 | Correlated219 | Correlated34 |  |
| Not Reported |  |  |  |
| Anxiety | < 0.05 |  |  |  |
| < 0.01 | Correlated206 |  | Correlated121,206 |
| Not Reported |  |  |  |
| Asthma | < 0.05 |  |  | Correlated129 |
| < 0.01 | Correlated206 | Correlated50 | Correlated206 |
| Not Reported |  |  |  |
| Cancer | < 0.05 | Correlated31,50 | Correlated31,50 |  |
| < 0.01 |  |  | Correlated31 |
| Not Reported |  |  |  |
| Cardiovascular Disease | < 0.05 | Correlated34 | Correlated34 |  |
| < 0.01 |  | Correlated135 |  |
| Not Reported |  |  |  |
| Cerebrovascular Disease | < 0.05 |  |  |  |
| < 0.01 |  |  | Correlated31 |
| Not Reported |  |  |  |
| Charlson Comorbidity Index | < 0.05 |  | Correlated22 |  |
| < 0.01 | Correlated50 | Correlated50 |  |
| Not Reported |  |  |  |
| Chronic Kidney Disease | < 0.05 |  |  |  |
| < 0.01 | Correlated50 | Correlated50 | Correlated31 |
| Not Reported |  |  |  |
| Depression | < 0.05 |  |  | Correlated21,129 |
| < 0.01 | Correlated121 | Correlated121 | Correlated121,206 |
| Not Reported |  |  |  |
| Diabetes | < 0.05 | Correlated206 |  |  |
| < 0.01 | Correlated70 |  | Correlated31,206 |
| Not Reported |  |  |  |
| Elixhauser Comorbidity Index | < 0.05 |  |  |  |
| < 0.01 | Correlated48 |  |  |
| Not Reported |  |  |  |
| Gastro-Esophageal Reflux Disease | < 0.05 |  |  | Correlated121 |
| < 0.01 |  |  |  |
| Not Reported |  |  |  |
| Heart Failure | < 0.05 |  |  |  |
| < 0.01 |  |  | Correlated31,206 |
| Not Reported |  |  |  |
| Right Sided Heart Failure/Cor Pulmonale | < 0.05 |  |  | Correlated21 |
| < 0.01 |  | Correlated22 |  |
| Not Reported |  |  |  |
| Hypertension | < 0.05 |  |  |  |
| < 0.01 |  |  | Correlated206 |
| Not Reported |  |  |  |
| Ischemic Heart Disease | < 0.05 |  |  |  |
| < 0.01 | Correlated206 |  | Correlated206 |
| Not Reported |  |  |  |
| Liver Disease | < 0.05 |  | Correlated31 | Correlated31 |
| < 0.01 |  |  |  |
| Not Reported |  |  |  |
| Myocardial Infarction | < 0.05 |  |  | Correlated129 |
| < 0.01 |  |  | Correlated31 |
| Not Reported |  |  |  |
| Osteoporosis | < 0.05 |  |  | Correlated129 |
| < 0.01 |  |  | Correlated206 |
| Not Reported |  |  |  |
| Peripheral Vascular Disease | < 0.05 |  |  | Correlated31 |
| < 0.01 |  |  |  |
| Not Reported |  |  |  |
| Pulmonary Vascular Disease | < 0.05 |  |  |  |
| < 0.01 |  |  | Correlated206 |
| Not Reported |  |  |  |
| Sleep Apnea | < 0.05 |  |  |  |
| < 0.01 |  |  |  |
| Not Reported | Correlated99 |  |  |
| Vertebral Fracture | < 0.05 |  |  |  |
| < 0.01 |  |  |  |
| Not Reported | Correlated99 |  |  |
| Hospital Care | | | | |
| Hospital Length of Stay | < 0.05 | Inversely Correlated110 |  | Correlated187 |
| < 0.01 | Correlated50 | Correlated50,110 |  |
| Not Reported |  |  |  |
| Intubation | < 0.05 | Inversely Correlated48 |  |  |
| < 0.01 |  |  |  |
| Not Reported |  |  |  |
| Non-Invasive Ventilation | < 0.05 |  |  |  |
| < 0.01 | Correlated48 |  |  |
| Not Reported |  |  |  |
| Investigations | | | | |
| C-Reactive Protein at Discharge >= 7.6 mg/L | < 0.05 | Correlated70 |  |  |
| < 0.01 |  |  |  |
| Not Reported |  |  |  |
| Eosinophil Count | < 0.05 | Correlated114 |  | Correlated112  Inversely Correlated156 |
| < 0.01 | Correlated114,245 | Correlated114  Inversely Correlated135 | Correlated36,65,114,187 |
| Not Reported |  |  |  |
| FEV1 | < 0.05 |  |  |  |
| < 0.01 | Inversely Correlated34 | Inversely Correlated34,135 | Inversely Correlated245 |
| Not Reported |  |  |  |
| PaCO2 | < 0.05 |  |  |  |
| < 0.01 |  |  | Correlated21 |
| Not Reported |  |  |  |
| Serum CXCL9 <= 30.1 ng/mL | < 0.05 |  |  | Correlated187 |
| < 0.01 |  |  |  |
| Not Reported |  |  |  |
| Serum YKL-40 Levels >= 14.5 ng/mL | < 0.05 |  |  | Correlated187 |
| < 0.01 |  |  |  |
| Not Reported |  |  |  |
| Suboptimal Peak Inspiratory Flow | < 0.05 | Correlated168 |  |  |
| < 0.01 |  |  |  |
| Not Reported |  |  |  |
| Medications During Admission | | | | |
| Dry Powder Inhaler vs Nebulized Therapy | < 0.05 |  | Correlated160 |  |
| < 0.01 | Correlated160 |  |  |
| Not Reported |  |  |  |
| Leukotriene Modifier | < 0.05 |  |  | Correlated31 |
| < 0.01 |  |  |  |
| Not Reported |  |  |  |
| Long-Acting Bronchodilator | < 0.05 |  | Correlated31 |  |
| < 0.01 |  |  | Correlated31 |
| Not Reported |  |  |  |
| Nebulized Long-Acting Beta2-Agonist vs Nebulized Short-Acting Beta2-Agonist | < 0.05 | Inversely Correlated136 |  |  |
| < 0.01 |  |  |  |
| Not Reported |  |  |  |
| Oxygen Therapy | < 0.05 |  |  |  |
| < 0.01 | Inversely Correlated185 |  | Correlated31 |
| Not Reported |  |  |  |
| Short-Acting Bronchodilator | < 0.05 |  |  |  |
| < 0.01 |  |  | Correlated31 |
| Not Reported |  |  |  |
| Systemic Corticosteroid | < 0.05 |  |  |  |
| < 0.01 |  |  | Correlated31 |
| Not Reported |  |  |  |
| Medications on Discharge | | | | |
| Long-Acting Muscarinic Antagonist | < 0.05 |  |  | Inversely Correlated207 |
| < 0.01 |  |  |  |
| Not Reported |  |  |  |
| Home Oxygen | < 0.05 |  |  | Correlated21 |
| < 0.01 |  | Correlated22 |  |
| Not Reported |  |  |  |
| Disposition | | | | |
| Discharge to Home Care | < 0.05 | Correlated48 |  |  |
| < 0.01 |  |  |  |
| Not Reported |  |  |  |

**Supplementary Table 3.** Significant Interventions for All-Cause Readmission

|  | **Type I Error** | **1 Month** | **2-3 Months** | **6-12 Months** |
| --- | --- | --- | --- | --- |
| Azithromycin | < 0.05 |  |  |  |
| < 0.01 |  | Inversely Correlated240 |  |
| Not Reported |  |  |  |
| COPD Care Package | < 0.05 | Inversely Correlated164,179,239 | Inversely Correlated37 | Inversely Correlated37,145,148,149 |
| < 0.01 | Inversely Correlated28,93,184,251 | Inversely Correlated184,212 | Inversely Correlated94 |
| Not Reported |  |  |  |
| Exacerbation Clinic | < 0.05 |  |  |  |
| < 0.01 |  | Inversely Correlated212 |  |
| Not Reported |  |  |  |
| Early Roflumilast | < 0.05 |  | Inversely Correlated153 |  |
| < 0.01 |  |  |  |
| Not Reported |  |  |  |
| Follow-Up Within 30 Days of Discharge | < 0.05 | Inversely Correlated219 |  |  |
| < 0.01 |  |  |  |
| Not Reported |  |  |  |
| Hospital Readmissions Reduction Program | < 0.05 |  |  |  |
| < 0.01 | Inversely Correlated169,197 |  |  |
| Not Reported |  |  |  |
| Macrolide Antibiotic Treatment | < 0.05 |  |  |  |
| < 0.01 | Inversely Correlated142 |  |  |
| Not Reported |  |  |  |
| N-Acetylcysteine | < 0.05 |  |  |  |
| < 0.01 |  |  | Inversely Correlated96 |
| Not Reported |  |  |  |
| Respiratory-Therapist Directed Care | < 0.05 |  |  |  |
| < 0.01 | Inversely Correlated243 |  |  |
| Not Reported |  |  |  |
| Sufficient (150min+/week) Physical Activity | < 0.05 |  |  |  |
| < 0.01 | Inversely Correlated175 |  |  |
| Not Reported |  |  |  |
| Pulmonary Rehabilitation | < 0.05 | Inversely Correlated119 | Inversely Correlated164 | Inversely Correlated227 |
| < 0.01 |  | Inversely Correlated119 | Inversely Correlated200 |
| Not Reported |  |  |  |

**Supplementary Table 4.** Significant Interventions for COPD-Related Readmission

|  | **Type I Error** | **1-Month** | **3-Month** | **12-Month** |
| --- | --- | --- | --- | --- |
| Antibiotics | < 0.05 | Correlated222  Inversely Correlated229 |  |  |
| < 0.01 |  |  |  |
| Not Reported |  |  |  |
| COPD Care Package | < 0.05 | Inversely Correlated37 | Inversely Correlated37,179 | Inversely Correlated37,145,148,149,166 |
| < 0.01 | Inversely Correlated138 | Inversely Correlated113 | Inversely Correlated47,147,238 |
| Not Reported |  |  |  |
| Early Roflumilast | < 0.05 |  | Inversely Correlated153 | Inversely Correlated153 |
| < 0.01 |  |  |  |
| Not Reported |  |  |  |
| Fluticasone Propionate/Salmeterol Combination | < 0.05 | Inversely Correlated71 |  |  |
| < 0.01 |  |  |  |
| Not Reported |  |  |  |
| Hospital Readmissions Reduction Program | < 0.05 | Inversely Correlated169 |  |  |
| < 0.01 |  |  |  |
| Not Reported |  |  |  |
| Inhaled Corticosteroids | < 0.05 |  |  | Inversely Correlated222 |
| < 0.01 |  |  |  |
| Not Reported |  |  |  |
| Oral Corticosteroids | < 0.05 |  |  |  |
| < 0.01 |  |  | Correlated222 |
| Not Reported |  |  |  |
| Oral Theophyllines | < 0.05 |  |  |  |
| < 0.01 |  |  | Correlated222 |
| Not Reported |  |  |  |
| Pulmonary Rehabilitation After Discharge | < 0.05 |  |  | Inversely Correlated227 |
| < 0.01 | Inversely Correlated |  |  |
| Not Reported |  |  |  |
